# Supplementary material for: Acral persistent papular mucinosis: a rare child case report and literature review
Source: PubMed Central journal article supplement — Transl Pediatr. 2024 Jun 27;13(6):987–93. doi: 10.21037/tp-23-607 (PMC11228902; doi:10.21037/tp-23-607), 2024-06-27
Supplement: tp-13-06-987-rc.pdf [file tp-13-06-987-rc.pdf]

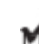

| Topic                            | Item No | Checklist item description                                                                                                                                                     | Reported on Page Number/Line Number | Reported on Section/Paragraph |
|----------------------------------|---------|--------------------------------------------------------------------------------------------------------------------------------------------------------------------------------|-------------------------------------|-------------------------------|
| Title                            | 1       | The diagnosis or intervention of primary focus followed by the words "case report"                                                                                             | Page1/Line 2                        | Section Title page            |
| Key Words                        | 2       | 2 to 5 key words that identify diagnoses or interventions in this case report, including "case report"                                                                         | Page2/Line 40                       | Section Abstract              |
| Abstract<br>(Structured summary) | 3a      | Background: state what is known and unknown; why the case report is unique and what it adds to existing literature.                                                            | Page2/Line 24 to 26                 | Section Abstract              |
|                                  | 3b      | Case Description: describe the patient's demographic details, main symptoms, history, important clinical findings, the main diagnosis, interventions, outcomes and follow-ups. | Page2/Line 27 to 36                 | Section Abstract              |
|                                  | 3c      | Conclusions: summarize the main take-away lesson, clinical impact and potential implications.                                                                                  | Page2/Line 37 to 39                 | Section Abstract              |
| Introduction                     | 4       | One or two paragraphs summarizing why this case is unique ( <b>may include references</b> )                                                                                    | Page3-4/Line 47 to 56               | Introduction/Paragraph 1      |
| Patient Information              | 5a      | De-identified patient specific information                                                                                                                                     | Page4/Line 59 to 60                 | Paragraph 2                   |
|                                  | 5b      | Primary concerns and symptoms of the patient                                                                                                                                   | Page4/Line 59 to 60                 | Paragraph 2                   |
|                                  | 5c      | Medical, family, and psycho-social history including relevant genetic information                                                                                              | Page4/Line 66 to 68                 | Paragraph 2                   |
|                                  | 5d      | Relevant past interventions with outcomes                                                                                                                                      | Page4/Line 68 to 69                 | Paragraph 2                   |
| Clinical Findings                | 6       | Describe significant physical examination (PE) and important clinical findings                                                                                                 | Page4/Line 71 to 72                 | Paragraph 2                   |
| Timeline                         | 7       | Historical and current information from this episode of care organized as a timeline                                                                                           | N/A                                 | N/A                           |
| Diagnostic Assessment            | 8a      | Diagnostic testing (such as PE, laboratory testing, imaging, surveys).                                                                                                         | Page5/Line 74 to 81                 | Paragraph 2                   |
|                                  | 8b      | Diagnostic challenges (such as access to testing, financial, or cultural)                                                                                                      | none                                | none                          |
|                                  | 8c      | Diagnosis (including other diagnoses considered)                                                                                                                               | Page5/Line 89 to 93                 | Paragraph 2                   |
|                                  | 8d      | Prognosis (such as staging in oncology) where applicable                                                                                                                       | not applicable                      | not applicable                |
| Therapeutic Intervention         | 9a      | Types of therapeutic intervention (such as pharmacologic, surgical, preventive, self-care)                                                                                     | Page5/Line 83 to 87                 | Paragraph 2                   |
|                                  | 9b      | Administration of therapeutic intervention (such as dosage, strength, duration)                                                                                                | not applicable                      | not applicable                |
|                                  | 9c      | Changes in therapeutic intervention (with rationale)                                                                                                                           | not applicable                      | not applicable                |

|                        |     |                                                                                                        |                                         |                             |
|------------------------|-----|--------------------------------------------------------------------------------------------------------|-----------------------------------------|-----------------------------|
| Follow-up and Outcomes | 10a | Clinician and patient-assessed outcomes (if available)                                                 | Page6/Line 95 to 96                     | Paragraph 2                 |
|                        | 10b | Important follow-up diagnostic and other test results                                                  | not applicable                          | not applicable              |
|                        | 10c | Intervention adherence and tolerability (How was this assessed?)                                       | not applicable                          | not applicable              |
|                        | 10d | Adverse and unanticipated events                                                                       | not applicable                          | not applicable              |
| Discussion             | 11a | A scientific discussion of the strengths AND limitations associated with this case report              | not applicable                          | not applicable              |
|                        | 11b | Discussion of the relevant medical literature <b>with references</b>                                   | Page6-8/Line 134 to 171                 | Discussion/Paragraph 3-4    |
|                        | 11c | The scientific rationale for any conclusions (including assessment of possible causes)                 | Page6-7/Line 105 to 132                 | Discussion/Paragraph 2      |
|                        | 11d | The primary “take-away” lessons of this case report (without references) in a one paragraph conclusion | Page9-10/Line 180 to 189                | Conclusions                 |
| Patient Perspective    | 12  | The patient should share their perspective in one to two paragraphs on the treatment(s) they received  | Page9/Line 172 to 179                   | Patient Perspective         |
| Informed Consent       | 13  | Did the patient give informed consent? Please provide if requested                                     | Yes <input checked="" type="checkbox"/> | No <input type="checkbox"/> |

Article information: <https://dx.doi.org/10.21037/tp-23-607>

\*As the checklist was provided upon initial submission, the page number/line number reported may be changed due to copyediting and may not be referable in the published version. In this case, the section/paragraph may be used as an alternative reference.
